# Supplementary material
Source: PubMed Central journal article supplement (PMC2519751)
Supplement: 90201.2008_1.pdf [file 90201.2008_1.pdf]

Table 1A and 1B. Genes whose expressions are induced (A) and reduced (B) by exposure to LSS. Fold changes divisible by zero are listed by “-“. Genes with a chi2 score of at least 7.65 are obtained when FDR is controlled at 5%. A number of genes that would not be considered differentially expressed when FDR is controlled at 5%, but would be considered differentially expressed without FDR control, have been included in cases where they match genes of known biological significance (these tags have chi2 scores between 3.85 and 7.64). TGFB1 (marked “\*\*”) did not reach statistical significance but has been included on the basis of its functional significance and likely downmodulation (confirmed by QRT-PCR, see Figure 1A).

Table 1A

| <i>Gene Function/ Name</i>                            | <i>Symbol</i> | <i>Accession</i> | <i>Ratio</i> | <i>0h LSS</i> | <i>24h LSS</i> | <i>Tag</i> | <i>Chi2</i> |
|-------------------------------------------------------|---------------|------------------|--------------|---------------|----------------|------------|-------------|
| <b>Adhesion</b>                                       |               |                  |              |               |                |            |             |
| carbohydrate sulfotransferase 5                       | CHST5         | NM_012126        | -            | 0.00          | 11.83          | CCACTGCACC | 13.36       |
| <b>Apoptosis</b>                                      |               |                  |              |               |                |            |             |
| Caspase 2                                             | CASP2         | NM_001224.2      | -            | 0.00          | 4.30           | ATCCACCCAC | 4.86        |
| DNA fragmentation factor, 45 kD, alpha polypeptide    | DFFA          | NM_004401        | 4.70         | 7.08          | 33.33          | AACCTGGGAG | 18.56       |
| <b>Cell Division</b>                                  |               |                  |              |               |                |            |             |
| cyclin-dependent kinase inhibitor 1A                  | CDKN1A        | NM_000389.3      | 1.61         | 10.63         | 17.20          | TGTCCTGGTT |             |
| Polycystin 1                                          | PKD1          | NM_000296        | 3.85         | 5.31          | 20.43          | AACCCAGGAG | 9.6         |
| <b>Coagulation</b>                                    |               |                  |              |               |                |            |             |
| Coagulation factor II receptor-like 2                 | F2RL2         | NM_004101        | -            | 0.00          | 9.68           | TTGACCAGGC | 10.93       |
| <b>Cytoskeletal</b>                                   |               |                  |              |               |                |            |             |
| actin cross-linking factor                            | MACF1         | NM_012090        | -            | 0.00          | 7.53           | CACTCCAGCC | 8.5         |
| calponin 2                                            | CNN2          | NM_004368        | 2.23         | 10.63         | 23.65          | CCCCGCCAAG | 5.24        |
| gelsolin                                              | GSN           | NM_000177        | 3.03         | 3.54          | 10.75          | TCACCGGTCA | 3.9         |
| Filamin A                                             | FLNA          | NM_001456        | 1.76         | 25.68         | 45.15          | GTTCGTGCCA | 5.61        |
| transglutaminase 2                                    | TGM2          | NM_004613        | 10.93        | 0.89          | 9.68           | ATTGCACCAC | 8.12        |
| <b>Extracellular Matrix</b>                           |               |                  |              |               |                |            |             |
| Collagen, type IV, alpha 1                            | COL4A1        | NM_001845        | 1.54         | 32.77         | 50.53          | GACCGCAGGA | 3.95        |
| <b>Ion Channels</b>                                   |               |                  |              |               |                |            |             |
| cyclic nucleotide-gated potassium channel 2           | HCN2          | NM_001194        | -            | 0.00          | 5.38           | CCATTGCGCT | 6.07        |
| solute carrier family 11 member 1                     | SLC11A1       | NM_000578        | -            | 0.00          | 6.45           | CTGGCCAGGC | 7.28        |
| solute carrier family 14 (urea transporter), member 1 | SLC14A1       | NM_015865        | 5.26         | 2.66          | 13.98          | GTGGTGGGTG | 8.41        |
| solute carrier family 14 (urea transporter), member 2 | SLC14A2       | NM_007163        | 6.37         | 3.54          | 22.58          | GTGGCGGGCA | 15.23       |
| <b>Inflammation</b>                                   |               |                  |              |               |                |            |             |
| intercellular adhesion molecule 1                     | ICAM1         | NM_000201        | 9.10         | 1.77          | 16.13          | GTTCCTGCA  | 12.73       |
| interleukin 2 receptor, alpha                         | IL2RA         | NM_000417        | -            | 0.00          | 8.60           | ATGGCACCAC | 9.71        |
| TNF receptor-associated factor 5                      | TRAF5         | NM_004619        | 15.78        | 0.89          | 13.98          | ATCTCAGCTC | 12.86       |
| tumor necrosis factor receptor 1B                     | TNFRSF1B      | NM_001066        | 4.86         | 1.77          | 8.60           | GTAAAACCCC | 4.9         |
| <b>Metabolic</b>                                      |               |                  |              |               |                |            |             |
| cytochrome c oxidase subunit VIIa polypeptide 2 like  | COX7A2L       | NM_004718        | -            | 0.00          | 4.30           | GCTTCGCAGC | 4.86        |
| glucose phosphate isomerase                           | GPI           | NM_000175        | -            | 0.00          | 4.30           | ATCCGCCTGC | 4.86        |
| glucose-6-phosphatase                                 | G6PC          | NM_000151        | 4.25         | 1.77          | 7.53           | AGCCACCGCA | 3.86        |
| NADH-coenzyme Q reductase Fe-S protein 6              | NDUFS6        |                  | 4.25         | 1.77          | 7.53           | CGGTTACTGT | 3.86        |
| tyrosine aminotransferase                             | TAT           | NM_000353        | 18.21        | 0.89          | 16.13          | GGCGACAGAG | 15.25       |
| <b>Ribosomal</b>                                      |               |                  |              |               |                |            |             |

|                                             |         |           |       |        |        |            |       |
|---------------------------------------------|---------|-----------|-------|--------|--------|------------|-------|
| ribosomal protein S27                       | RPS27   | NM_001030 | 1.76  | 37.19  | 65.58  | CACAAACGGT | 8.23  |
| ribosomal protein S3                        | RPS3    | NM_001005 | 1.53  | 74.39  | 113.95 | CCCCAGCCAG | 8.68  |
| ribosomal protein L10a                      | RPL10A  | NM_007104 | 1.38  | 130.18 | 179.53 | GGCAAGCCCC | 8.19  |
| ribosomal protein L13a                      | RPL13A  | NM_012423 | 1.47  | 98.30  | 144.06 | AGGCTACGGA | 9.01  |
| ribosomal protein L28                       | RPL28   | NM_000991 | 2.12  | 80.59  | 170.93 | GCAGCCATCC | 34.43 |
| ribosomal protein L29                       | RPL29   | NM_000992 | 1.45  | 183.32 | 266.61 | GGGCTGGGGT | 16.14 |
| <b>Stress response</b>                      |         |           |       |        |        |            |       |
| DnaJ (Hsp40) homolog, subfamily B, member 1 | HSPF1   | NM_006145 | 15.98 | 5.31   | 84.93  | AGACCAAAGT | 78.44 |
| DnaJ (Hsp40) homolog, subfamily B, member 1 | HSPF1   | NM_006145 | -     | 0.00   | 27.95  | AGAGGGTGGG | 31.58 |
| ferritin, light polypeptide                 | FLT     | NM_000146 | 1.47  | 46.94  | 68.80  | CCCTGGGTTC | 4.3   |
| folate transporter/carrier                  | SLC19A1 | NM_003056 | 27.92 | 0.89   | 24.73  | TTAGCCAGGA | 24.88 |
| heat shock 105kD                            | HSP105B | NM_006644 | 7.69  | 2.66   | 20.43  | TGAAAGTGTG | 15.08 |
| heat shock 27kD protein 1                   | HSPB1   | NM_001540 | 2.43  | 13.28  | 32.25  | CCCAAGCTAG | 8.4   |

|                                                       |         |           |        |       |        |            |        |
|-------------------------------------------------------|---------|-----------|--------|-------|--------|------------|--------|
| heat shock 60kD protein 1                             | HSPD1   | NM_002156 | -      | 0.00  | 4.30   | CCATTGCACC | 4.86   |
| heat shock 70kD protein 1A                            | HSPA1A  | NM_005345 | 114.11 | 0.89  | 101.05 | CAGAGATGAA | 111.11 |
| heat shock 70kD protein 1B                            | HSPA1B  | NM_005346 | -      | 0.00  | 44.08  | AAGAGCGCCG | 49.8   |
| heat shock 70kD protein 5                             | HSPA5   | NM_005347 | 5.58   | 48.71 | 271.98 | TGCATCTGGT | 170.87 |
| heat shock 90kD protein 1, beta                       | HSPCB   | NM_007355 | 2.65   | 9.74  | 25.80  | GGCTCCCACT | 7.74   |
| heme oxygenase 1                                      | HMOX1   | NM_002133 | 22.21  | 8.86  | 196.73 | CGTGGGTGGG | 192.7  |
| homocysteine-inducible ubiquitin-like domain member 1 | HERPUD1 | NM_014685 | 6.07   | 1.77  | 10.75  | TTTTAGCAGG | 7.06   |
| immediate early response 5                            | IER5    | NM_016545 | -      | 0.00  | 4.30   | AACCCCTGGA | 4.86   |
| metallothionein 1A                                    | MT1A    | K01383    | -      | 0.00  | 5.38   | AGCTGTGCCA | 6.07   |
| metallothionein 2A                                    | MT2A    | NM_005953 | 3.82   | 6.20  | 23.65  | GCGAGCTGAA | 11.04  |
| novel SH2-containing protein 1                        | SH2D3A  | NM_005490 | -      | 0.00  | 4.30   | GTGAGACCTC | 4.86   |
| superoxide dismutase 2, mitochondrial                 | SOD2    | NM_000636 | -      | 0.00  | 4.30   | GCTTGCAAAA | 4.86   |
| <b>Signal Transduction</b>                            |         |           |        |       |        |            |        |
| dual specificity phosphatase 6                        | DUSP6   | NM_001946 | -      | 0.00  | 4.30   | GGCTCACTTT | 4.86   |
| hippocalcin-like 1                                    | HPCAL1  | NM_002149 | 4.05   | 2.66  | 10.75  | TGTGCCCTGA | 5.29   |

Table 1B.

| Gene Name/function                    | Symbol | Accession | Ratio | 0h LSS | 24h LSS | Tag        | Chi2  |
|---------------------------------------|--------|-----------|-------|--------|---------|------------|-------|
| <b>Angiogenesis</b>                   |        |           |       |        |         |            |       |
| connective tissue growth factor       | CTGF   | NM_001901 | 0.25  | 142.58 | 35.48   | TTTGACCTT  | 62.30 |
| cysteine-rich, angiogenic inducer, 61 | CYR61  | NM_001554 | 0.36  | 15.05  | 5.38    | AGTGTCTGTG | 4.48  |
| phosphoglycerate dehydrogenase        | PHGDH  | NM_006623 | 0.16  | 27.45  | 4.30    | TTACCTCCTT | 16.10 |
| phosphoglycerate kinase 1             | PGK1   | NM_000291 | 0.34  | 15.94  | 5.38    | GAAACAAGAT | 5.10  |
| secreted protein, acidic,             | SPARC  | NM_003118 | 0.00  | 4.43   | 0.00    | AAATGCTTGG | 4.12  |

|                                                        |          |             |      |        |        |            |       |
|--------------------------------------------------------|----------|-------------|------|--------|--------|------------|-------|
| cysteine-rich (osteonectin)                            |          |             |      |        |        |            |       |
| Thrombospondin 1                                       | THBS1    | NM_003246   | 0.20 | 10.63  | 2.15   | AGGTCTTCAA | 5.39  |
| angiopoietin-like 4                                    | ANGPTL4  | NM_139314   | 0.30 | 10.63  | 3.23   | GTGCTGGTGC | 3.85  |
| endoglin                                               | ENG      | NM_000118   | 0.04 | 30.11  | 1.08   | AAACCAAAAA | 25.31 |
| <b>Apoptosis</b>                                       |          |             |      |        |        |            |       |
| death-associated protein kinase 3                      | DAPK3    | NM_001348   | 0.00 | 6.20   | 0.00   | TGGAGCATCG | 5.77  |
| Intercellular adhesion molecule 2                      | ICAM2    | NM_000873   | 0.33 | 23.03  | 7.53   | GCCACCACCA | 7.65  |
| poly(rC)-binding protein 4                             | PCBP4    | NM_020418.2 | 0.00 | 4.43   | 0.00   | GGGCAGGGGC | 4.12  |
| <b>Cell-Cell Communication</b>                         |          |             |      |        |        |            |       |
| cadherin 5, type 2, VE-cadherin                        | CDH5     | NM_001795   | 0.51 | 31.88  | 16.13  | ACAAGTACTG | 5.12  |
| talin 1                                                | TLN1     | NM_006289   | 0.00 | 5.31   | 0.00   | CTCCAATAAA | 4.94  |
| <b>Cell Division</b>                                   |          |             |      |        |        |            |       |
| CDC10 (cell division cycle 10, S. cerevisiae, homolog) | CDC10    | NM_001788   | 0.00 | 4.43   | 0.00   | GCCTCTTGAA | 4.12  |
| CDC20 (cell division cycle 20, S. cerevisiae, homolog) | CDC20    | NM_001255   | 0.00 | 6.20   | 0.00   | TCTCCCTTCA | 5.77  |
| Cdc42 effector protein 2                               | CDC42EP2 | NM_006779   | 0.24 | 8.86   | 2.15   | CTGCTGCTGG | 3.94  |
| calpain, small subunit 1                               | CAPNS1   | NM_001749   | 0.69 | 73.50  | 50.53  | CCCCAGTTGC | 4.27  |
| cyclin B1                                              | CCNB1    | NM_031966   | 0.32 | 13.28  | 4.30   | TGCCATCTGT | 4.46  |
| cyclin D1                                              | CCND1    | NM_053056   | 0.00 | 6.20   | 0.00   | AAAGTCTAGA | 5.77  |
| enhancer of rudimentary (Drosophila) homolog           | ERH      | NM_004450   | 0.15 | 7.08   | 1.08   | TCCTCAAGAT | 4.22  |
| nucleophosmin (nucleolar phosphoprotein B23, numatrin) | NPM1     | NM_002520   | 0.15 | 14.17  | 2.15   | TGAAATAAAA | 8.43  |
| PDGFA associated protein 1                             | PDAP1    | NM_014891   | 0.00 | 7.08   | 0.00   | CTCCACAAAT | 6.59  |
| <b>Cell Motility</b>                                   |          |             |      |        |        |            |       |
| tetraspan 3                                            | TSPAN-3  | NM_005724   | 0.32 | 13.28  | 4.30   | TAGACTAGCA | 4.46  |
| <b>Cell Surface Structure</b>                          |          |             |      |        |        |            |       |
| galectin 1                                             | LGALS1   | NM_002305   | 0.59 | 325.89 | 192.43 | GCCCCCAATA | 34.51 |
| galectin 3                                             | LGALS3   | NM_002306   | 0.00 | 6.20   | 0.00   | TTCACTGTGA | 5.77  |
| moesin                                                 | MSN      | NM_002444   | 0.27 | 15.94  | 4.30   | TTCTATTTCA | 6.47  |
| <b>Cytoskeletal</b>                                    |          |             |      |        |        |            |       |
| actin, beta                                            | ACTB     | NM_001101   | 0.21 | 41.62  | 8.60   | GCTTTATTTG | 20.84 |
| capping protein muscle Z-line, beta                    | CAPZB    | NM_004930   | 0.00 | 4.43   | 0.00   | CTAACCAGAC | 4.12  |
| Cofilin 1                                              | CFL1     | NM_005507   | 0.64 | 219.62 | 140.83 | GAAGCAGGAC | 17.31 |
| filamin A, alpha                                       | FLNA     | NM_001456   | 0.42 | 20.37  | 8.60   | GCCCAAGGAC | 4.69  |
| myosin, heavy polypeptide 9, non-muscle                | MYH9     | NM_002473   | 0.28 | 23.03  | 6.45   | TGCTAAAAAA | 9.02  |
| profilin 1                                             | PFN1     | NM_005022   | 0.12 | 8.86   | 1.08   | TGGTTTTGGC | 5.78  |
| singed (Drosophila)-like                               | FSCN1    | NM_003088   | 0.38 | 14.17  | 5.38   | ATAGTAGCTT | 3.87  |
| thymosin, beta 4, X chromosome                         | TMSB4X   | NM_021109   | 0.20 | 15.94  | 3.23   | AGTTTCCCAA | 8.09  |
| thymosin, beta 4, X chromosome                         | TMSB4X   | NM_021109   | 0.71 | 139.92 | 99.98  | TTGGTGAAGG | 6.70  |
| Tropomyosin 2 (beta)                                   | TPM2     | NM_003289   | 0.36 | 15.05  | 5.38   | GACCAGGCCC | 4.48  |
| tubulin alpha 6                                        | TUBA6    | NM_032704   | 0.38 | 16.83  | 6.45   | GCTGCCCTTG | 4.53  |
| tubulin, alpha 3                                       | TUBA3    | NM_006009   | 0.19 | 11.51  | 2.15   | AATGCTTTGT | 6.14  |
| tubulin, alpha, ubiquitous                             | K-       | NM_006082   | 0.13 | 83.24  | 10.75  | TGTACCTGTA | 53.17 |

|                                                                                             |         |           |      |        |       |             |       |
|---------------------------------------------------------------------------------------------|---------|-----------|------|--------|-------|-------------|-------|
|                                                                                             | ALPHA-1 |           |      |        |       |             |       |
| tubulin, beta, 2                                                                            | TUBB2   | NM_006088 | 0.24 | 40.74  | 9.68  | CTGTACAGAC  | 18.44 |
| <b>ENOS</b>                                                                                 |         |           |      |        |       |             |       |
| dimethylarginine dimethylaminohydrolase 1                                                   | DDAH1   | NM_012137 | 0.00 | 4.43   | 0.00  | TATACCAATC  | 4.12  |
| <b>Extracellular Matrix</b>                                                                 |         |           |      |        |       |             |       |
| EGF-containing fibulin-like extracellular matrix protein 1                                  | EFEMP1  | NM_004105 | 0.47 | 118.67 | 55.90 | CAAGGGTAAG  | 22.31 |
| fibrillin 1                                                                                 | FBN1    | NM_000138 | 0.13 | 7.97   | 1.08  | TGCAATATGC  | 4.99  |
| fibronectin 1                                                                               | FN1     | NM_002026 | 0.29 | 15.05  | 4.30  | ATCTTGTTAC  | 5.79  |
| hyaluronoglucosaminidase 2                                                                  | HYAL2   | NM_003773 | 0.22 | 9.74   | 2.15  | TAGGACCCTG  | 4.66  |
| integrin, alpha 5                                                                           | ITGA5   | NM_002205 | 0.37 | 31.88  | 11.83 | ATGGCAACAG  | 9.00  |
| integrin, alpha E                                                                           | ITGAE   | NM_002208 | 0.00 | 5.31   | 0.00  | GAGCTGTTGG  | 4.94  |
| integrin, alpha V                                                                           | ITGAV   | NM_002210 | 0.45 | 23.91  | 10.75 | TAACTTGTGA  | 4.92  |
| integrin-linked kinase                                                                      | ILK     | NM_004517 | 0.28 | 23.03  | 6.45  | GGAGGGATCA  | 9.02  |
| laminin receptor 1                                                                          | LAMR1   | NM_002295 | 0.51 | 80.59  | 40.85 | GAAAAATGGT  | 12.88 |
| lysyl oxidase-like 2                                                                        | LOXL2   | NM_002318 | 0.50 | 45.16  | 22.58 | TGTCATCACA  | 7.45  |
| procollagen-proline, 2-oxoglutarate 4-dioxygenase (proline 4-hydroxylase), beta polypeptide | P4HB    | NM_000918 | 0.36 | 15.05  | 5.38  | CCTGGAAGAG  | 4.48  |
| Vimentin                                                                                    | VIM     | NM_003380 | 0.60 | 52.25  | 31.18 | TCCAAATCGA  | 5.31  |
| <b>Immune Response</b>                                                                      |         |           |      |        |       |             |       |
| HLA class II region expressed gene KE2                                                      | HKE2    | NM_014260 | 0.12 | 8.86   | 1.08  | GTGGGGGGAG  | 5.78  |
| major histocompatibility complex, class I, A                                                | HLA-A   | NM_002116 | 0.24 | 17.71  | 4.30  | AGAAAAAAAAA | 7.88  |
| <b>Inflammation</b>                                                                         |         |           |      |        |       |             |       |
| pentaxin-related gene, rapidly induced by IL-1 beta                                         | PTX3    | NM_002852 | 0.00 | 15.94  | 0.00  | GTGCTTTCAG  | 14.83 |
| <b>Intracellular Motility</b>                                                               |         |           |      |        |       |             |       |
| sorting nexin 3                                                                             | SNX3    | NM_003795 | 0.00 | 7.08   | 0.00  | GAAGATTAAT  | 6.59  |
| <b>Ion Channels</b>                                                                         |         |           |      |        |       |             |       |
| ATP synthase, H+ transporting, mitochondrial F0 complex, subunit c (subunit 9) isoform 3    | ATP5G3  | NM_001689 | 0.47 | 23.03  | 10.75 | GGAATGTACG  | 4.40  |
| ATP synthase, H+ transporting, mitochondrial F0 complex, subunit f, isoform 2               | ATP5J2  | NM_004889 | 0.00 | 7.08   | 0.00  | ACTGGTAAAA  | 6.59  |
| ATP synthase, H+ transporting, mitochondrial F0 complex, subunit g                          | ATP5L   | NM_006476 | 0.51 | 38.08  | 19.35 | TGTGATCAGA  | 6.05  |
| ATP synthase, H+ transporting, mitochondrial F1 complex, delta subunit                      | ATP5D   | NM_001687 | 0.00 | 4.43   | 0.00  | GGGCTCTCCT  | 4.12  |
| ATP synthase, H+ transporting, mitochondrial F1 complex, delta subunit                      | ATP5D   | NM_001687 | 0.24 | 8.86   | 2.15  | TTGGACCTGG  | 3.94  |
| chloride intracellular channel 1                                                            | CLIC1   | NM_001288 | 0.30 | 10.63  | 3.23  | GTACTGTGGC  | 3.85  |
| solute carrier family 1, member 5                                                           | SLC1A5  | NM_005628 | 0.00 | 8.86   | 0.00  | TGCCTGCTCC  | 8.24  |
| solute carrier family 2 member 1                                                            | SLC2A1  | NM_006516 | 0.00 | 6.20   | 0.00  | GAGAGCTCCC  | 5.77  |

|                                                                                    |          |           |      |        |       |            |       |
|------------------------------------------------------------------------------------|----------|-----------|------|--------|-------|------------|-------|
| solute carrier family 9 (sodium/hydrogen exchanger), isoform 3 regulatory factor 2 | SLC9A3R2 | NM_004785 | 0.26 | 12.40  | 3.23  | CGCGCTCTCA | 5.20  |
| WD repeat domain 1                                                                 | WDR1     | NM_005112 | 0.00 | 7.08   | 0.00  | AAAAATAAAG | 6.59  |
| voltage-dependent anion channel 3                                                  | VDAC3    | NM_005662 | 0.00 | 7.08   | 0.00  | ACTGGTAAAA | 6.59  |
| <b>Metabolic</b>                                                                   |          |           |      |        |       |            |       |
| branched chain alpha-ketoacid dehydrogenase kinase                                 | BCKDK    | NM_005881 | 0.00 | 7.08   | 0.00  | GAGCTGGGCA | 6.59  |
| glyceraldehyde-3-phosphate dehydrogenase                                           | GAPD     | NM_002046 | 0.27 | 137.27 | 36.55 | TACCATCAAT | 56.55 |
| lactate dehydrogenase A                                                            | LDHA     | NM_005566 | 0.00 | 4.43   | 0.00  | TCTTGTGCAT | 4.12  |
| lactate dehydrogenase B                                                            | LDHB     | NM_002300 | 0.19 | 11.51  | 2.15  | GATCACAGTT | 6.14  |
| NADH dehydrogenase (ubiquinone) 1 alpha subcomplex, 7                              | NDUFA7   | NM_005001 | 0.00 | 6.20   | 0.00  | TCGTCCGAGA | 5.77  |
| NADH dehydrogenase (ubiquinone) flavoprotein 1                                     | NDUFV1   | NM_007103 | 0.17 | 18.60  | 3.23  | TGGAATGCTG | 10.35 |
| pyruvate carboxylase                                                               | PC       | NM_000920 | 0.00 | 4.43   | 0.00  | CAGCAAAAAA | 4.12  |
| pyruvate dehydrogenase (lipoamide) alpha 1                                         | PDHA1    | NM_000284 | 0.15 | 7.08   | 1.08  | CAGTTTGTAC | 4.22  |
| <b>Nuclear Matrix</b>                                                              |          |           |      |        |       |            |       |
| matrin 3                                                                           | MATR3    | NM_018834 | 0.00 | 5.31   | 0.00  | TTTGGAATGT | 4.94  |
| Nucleolin                                                                          | NCL      | NM_005381 | 0.12 | 8.86   | 1.08  | TACAAAACCA | 5.78  |
| <b>Ribosomal</b>                                                                   |          |           |      |        |       |            |       |
| mitochondrial ribosomal protein 64                                                 | MRPL51   | NM_016497 | 0.00 | 5.31   | 0.00  | GGAAGTTTCG | 4.94  |
| mitochondrial ribosomal protein L3                                                 | MRPL3    | NM_007208 | 0.00 | 5.31   | 0.00  | TCATCTTTGT | 4.94  |
| <b>Signal Transduction</b>                                                         |          |           |      |        |       |            |       |
| guanine nucleotide binding protein alpha inhibiting activity polypeptide 2         | GNAI2    | NM_002070 | 0.00 | 5.31   | 0.00  | TTTTATGGAA | 4.94  |
| myotubularin related protein 4                                                     | MTMR4    | NM_004687 | 0.00 | 4.43   | 0.00  | CAATGTGCTG | 4.12  |
| non-metastatic cells 2, protein (NM23B) expressed in                               | NME2     | NM_002512 | 0.17 | 12.40  | 2.15  | ACTGGGTCTA | 6.90  |
| Phosphatidylethanolamine-binding protein (PBP)                                     | PBP      | NM_002567 | 0.20 | 10.63  | 2.15  | GGGGTAAGAA | 5.39  |
| RAB32, member RAS oncogene family                                                  | RAB32    | NM_006834 | 0.00 | 4.43   | 0.00  | TGGCACTTCA | 4.12  |
| Ral guanine nucleotide exchange factor                                             | RALGPS1A | NM_014636 | 0.00 | 4.43   | 0.00  | ATCACTTGGG | 4.12  |
| RAN, member RAS oncogene family                                                    | RAN      | NM_006325 | 0.17 | 12.40  | 2.15  | TGCTTCATCT | 6.90  |
| ras homolog gene family, member B                                                  | ARHB     | NM_004040 | 0.15 | 7.08   | 1.08  | CACACAGTTT | 4.22  |
| <b>Stress Response</b>                                                             |          |           |      |        |       |            |       |
| heat shock 60kD protein 1                                                          | HSPD1    | NM_002156 | 0.00 | 7.97   | 0.00  | TACCAGTGTA | 7.42  |
| HS1 binding protein                                                                | HAX1     | NM_006118 | 0.00 | 4.43   | 0.00  | TCAGTTTGTC | 4.12  |
| <b>TGFβ Signaling</b>                                                              |          |           |      |        |       |            |       |
| endoglin                                                                           | ENG      | NM_000118 | 0.04 | 30.11  | 1.08  | AAACCAAAAA | 25.31 |
| latent transforming growth factor beta binding protein 2                           | LTBP2    | NM_000428 | 0.40 | 18.60  | 7.53  | GTGGAATAAA | 4.60  |
| ret finger protein                                                                 | RFP      | NM_006510 | 0.00 | 4.43   | 0.00  | CAGATTGTGA | 4.12  |

|                                                   |          |             |      |        |        |            |       |
|---------------------------------------------------|----------|-------------|------|--------|--------|------------|-------|
| transforming growth factor, beta-induced, 68kD    | TGFBI    | NM_000358   | 0.22 | 29.22  | 6.45   | GTGTGTTTGT | 13.98 |
| Transforming growth factor beta 1                 | TGFB1    | NM_000660   | 0.57 | 13.28  | 7.53   | GGGGCTGTAT | **    |
| <b>Coagulation</b>                                |          |             |      |        |        |            |       |
| plasminogen activator inhibitor type 1            | SERPINE1 | NM_000602   | 0.21 | 60.22  | 12.90  | TAAAAATGTT | 29.44 |
| <b>Transcription</b>                              |          |             |      |        |        |            |       |
| high-mobility group protein 14                    | HMGN1    | NM_004965   | 0.15 | 7.08   | 1.08   | GCTTTTTAGA | 4.22  |
|                                                   | HMGN2    | NM_005517.1 |      |        |        | ATTGTTTATG |       |
| high-mobility group protein 17                    |          |             | 0.17 | 12.40  | 2.15   |            | 6.90  |
| histone acetyltransferase                         | HBOA     | NM_007067   | 0.10 | 10.63  | 1.08   | CACGCAATGC | 7.37  |
| endothelial PAS domain protein 1                  | EPAS1    | NM_001430   | 0.00 | 6.20   | 0.00   | AACGTTATTA | 5.77  |
| MORF-related gene 15                              | MORF4L1  | NM_006791   | 0.30 | 14.17  | 4.30   | ATAGACGCAA | 5.12  |
| MYC-associated zinc finger protein                | MAZ      | NM_002383   | 0.29 | 18.60  | 5.38   | TACCCACCC  | 7.07  |
| poly(A)-binding protein, nuclear 1                | PABPN1   | NM_004643.1 | 0.00 | 6.20   | 0.00   | GTATTCCCCT | 5.77  |
| small nuclear ribonucleoprotein polypeptide E     | SNRPD1   | NM_006938   | 0.00 | 4.43   | 0.00   | CTAAAAGGAG | 4.12  |
| <b>Translation</b>                                |          |             |      |        |        |            |       |
| cyclophilin A                                     | PPIA     | NM_021130.1 | 0.64 | 137.27 | 88.15  | CCTAGCTGGA | 10.73 |
| eukaryotic translation elongation factor 1 beta 2 | EEF1B2   | NM_001959   | 0.20 | 15.94  | 3.23   | GCATTTAAAT | 8.09  |
| eukaryotic translation initiation factor 5A       | EIF5A    | NM_001970   | 0.33 | 35.42  | 11.83  | GGCTTTACCC | 11.48 |
| glutamyl-prolyl-tRNA synthetase                   | EPRS     | NM_004446   | 0.30 | 21.25  | 6.45   | AACTAAAAAA | 7.68  |
| poly(A)-binding protein, cytoplasmic 1            | PABPC1   | NM_002568   | 0.00 | 4.43   | 0.00   | AAAAGAAACT | 4.12  |
| putative translation initiation factor            | SUI1     | NM_005801   | 0.07 | 29.22  | 2.15   | CAATAAACTG | 22.01 |
| ribosomal protein L14                             | RPL14    | NM_003973   | 0.30 | 24.80  | 7.53   | CAGCTCACTG | 8.96  |
| ribosomal protein L23                             | RPL23    | NM_000978   | 0.49 | 56.68  | 27.95  | ATTCTCCAGT | 9.64  |
| ribosomal protein L37                             | RPL37    | NM_000997   | 0.32 | 40.74  | 12.90  | CAATAAATGT | 14.05 |
| ribosomal protein L39                             | RPL39    | NM_001000   | 0.32 | 20.37  | 6.45   | TTACCATATC | 7.02  |
| ribosomal protein S19                             | RPS19    | NM_001022   | 0.71 | 174.46 | 123.63 | CTGGGTTAAT | 8.74  |
| ribosomal protein S8                              | RPS8     | NM_001012   | 0.51 | 48.71  | 24.73  | TAATAAAGGT | 7.75  |
| <b>Vascular Reactivity</b>                        |          |             |      |        |        |            |       |
| endothelin 1                                      | EDN1     | NM_001955   | 0.43 | 17.71  | 7.53   | CTTTGTTTTG | 4.04  |
| insulin-like growth factor binding protein 7      | IGFBP7   | NM_001553   | 0.19 | 50.48  | 9.68   | CATATCATTA | 26.52 |
